# Supplementary material for: Topical antibiotics as a major contextual hazard toward bacteremia within selective digestive decontamination studies: a meta-analysis
Source: Springer Nature journal article supplement (doi:10.1186/s12879-014-0714-x), 2014-12-01
Supplement: MOESM1 [file 9739434]

**Additional file 1:** Table of contents

|                                                                                                   |    |
|---------------------------------------------------------------------------------------------------|----|
| Table S1: Listing of observational studies (Benchmark groups)                                     | 2  |
| Table S2: Listing of studies of non-antibiotic-based methods of VAP prevention                    | 4  |
| Table S3: Listing of studies of SDD– non-concurrent groups                                        | 6  |
| Table S4: Listing of studies of SDD– RCCT’s                                                       | 8  |
| Table S5: Listing of studies of SDD-RCCT’s with Duplex design                                     | 11 |
| Table S6: Numbers of Coagulase negative Staphylococcus and <i>Pseudomonas</i> bacteremia isolates | 13 |
| References S1-S113                                                                                | 14 |

Table S1: Observational studies (Benchmark groups) <sup>a</sup>

| Study                                     | Bacteremia definition <sup>b</sup> | Group size | VAP-IP (%) | B-IP (%) |
|-------------------------------------------|------------------------------------|------------|------------|----------|
| Apostolopoulou et al 2003 <sup>1 a</sup>  | NS                                 | 175        | 32         | 19       |
| Berg et al 1995 <sup>2</sup>              | CDC                                | 123        | 33         | 4.9      |
| Berg et al 1995 <sup>2</sup>              | CDC                                | 130        | 16.2       | 5.4      |
| Bonten et al 1997 <sup>3</sup>            | NS                                 | 42         | 25         | 17       |
| Cade et al 1993 <sup>4</sup>              | CDC                                | 98         | 36         | 8.2      |
| Craven et al 1988 <sup>5</sup>            | CDC                                | 526        | 17         | 4.8      |
| Craven et al 1988 <sup>5</sup>            | CDC                                | 799        | 9          | 7.5      |
| El-Masri et al 2004 <sup>6</sup>          | CDC                                | 361        | NA         | 15.2     |
| Fagon et al 1989 <sup>7</sup>             | NS                                 | 52         | 9          | 27       |
| Fagon et al 1996 <sup>8 a</sup>           | CDC                                | 1978       | 17         | 11       |
| Fieselmann et al 1999 <sup>9</sup>        | CDC                                | 224        | 21         | 4.9      |
| Garrouste-Orgeas et al 2000 <sup>10</sup> | CDC                                | 291        | NA         | 6.5      |
| Garrouste-Orgeas et al 2006 <sup>11</sup> | CDC                                | 3247       | NA         | 7.1      |
| George et al 1998 <sup>12</sup>           | CDC                                | 223        | 13         | 14       |
| Giard et al 2008 <sup>13</sup>            | NS                                 | 7236       | 13         | 5.2      |
| Girou et al 2000 <sup>14</sup>            | CDC                                | 50         | 22         | 10       |
| Guimaraes et al 2006 <sup>15 a</sup>      | NS                                 | 278        | 38         | 5        |
| Hébert et al 1999 <sup>16</sup>           | NS                                 | 420        | 21         | 9.5      |
| Hébert et al 1999 <sup>16</sup>           | NS                                 | 418        | 21         | 7.2      |
| Hugonnet et al 2004 <sup>17</sup>         | CDC                                | 432        | 24         | 15       |
| Ibrahim et al 2000 <sup>18</sup>          | CDC                                | 4913       | NA         | 10       |
| Jacobs et al 1990 <sup>19</sup>           | NS                                 | 24         | 54         | 17       |
| Kollef et al 1997 <sup>20 a</sup>         | CDC                                | 353        | 12         | 3.7      |
| Kollef et al 1997 <sup>20 a</sup>         | CDC                                | 327        | 7          | 3.4      |
| Kunac et al 2013 <sup>21</sup>            | CDC                                | 206        | 29         | 13       |
| Laupland et al 2002 <sup>22</sup>         | CDC                                | 1017       | NA         | 4.4      |
| Laupland et al 2004 <sup>23</sup>         | CDC                                | 4473       | NA         | 4.2      |
| Magnason et al 2008 <sup>24</sup>         | CDC                                | 280        | 7.5        | 8.9      |
| Nourdine et al 1999 <sup>25</sup>         | CDC                                | 607        | 13         | 2.3      |

| Study                               | Bacteremia definition | Group size | VAP-IP (%) | B-IP (%) |
|-------------------------------------|-----------------------|------------|------------|----------|
| Osmon et al 2008 <sup>26</sup>      | CDC                   | 893        | NA         | 13       |
| Potgieter et al 1987 <sup>27</sup>  | NS                    | 250        | 20         | 3.2      |
| Rello et al 1994 <sup>28</sup>      | NS                    | 1650       | NA         | 6.7      |
| Reusser et al 1989 <sup>29</sup>    | NS                    | 40         | 38         | 13       |
| Salata et al 1987 <sup>30</sup>     | NS                    | 51         | 41         | 14       |
| Shorr et al 2004 <sup>31,32</sup>   | NA                    | 3502       | 20.5       | 3.3      |
| Sofianou et al 2000 <sup>33 a</sup> | NS                    | 198        | 34         | 5.6      |
| Torres et al 1990 <sup>34 a</sup>   | NS                    | 78         | 24         | 13       |
| Urli et al 2002 <sup>35</sup>       | CDC                   | 178        | 65         | 22       |
| Violan et al 1998 <sup>36 a</sup>   | NS                    | 314        | 26         | 18       |

Table S1 footnotes

- a. The indicated studies were derived from the following systematic reviews;
- Melsen WG, Rovers MM, Bonten MJM. Ventilator-associated pneumonia and mortality: A systematic review of observational studies. *Crit Care Med* 2009;37:2709–18.
  - Safdar N, Dezfulian C, Collard HR, Saint S. Clinical and economic consequences of ventilator-associated pneumonia: a systematic review. *Crit Care Med* 2005;33:2184–93.
  - Agrafiotis M, Siempos II, Ntaidou TK, Falagas ME. Attributable mortality of ventilator-associated pneumonia: a meta-analysis. *Intern J Tub Lung Dis* 2011;15:1154-1163.
- b. Bacteremia defining criteria; NA, not applicable, NS, not specified; CDC, Center for disease control definitions.

**Table S2: Studies of non-antibiotic-based methods of VAP prevention<sup>a</sup>**

|                                                 | Bacteremia definition <sup>b</sup> | Control groups        |            |            |          | Intervention groups   |            |            |          |
|-------------------------------------------------|------------------------------------|-----------------------|------------|------------|----------|-----------------------|------------|------------|----------|
|                                                 |                                    | Exposure <sup>c</sup> | Group size | VAP-IP (%) | B-IP (%) | Exposure <sup>c</sup> | Group size | VAP-IP (%) | B-IP (%) |
| <b>Gastric based interventions</b>              |                                    |                       |            |            |          |                       |            |            |          |
| Acosta-escribano et al 2010 <sup>37 a</sup>     | CDC                                | G feed                | 54         | 57         | 3.7      | SB feed               | 50         | 32         | 12       |
| Barraud et al 2010 <sup>38 a</sup>              | NS                                 | SC                    | 80         | 19         | 14       | Probiotic             | 87         | 26         | 3.4      |
| Bonten et al 1995 <sup>39 a</sup>               | NS                                 | SC                    | 74         | 22         | 4.1      | sucrulfate            | 67         | 22         | 3        |
| Doig et al 2013 <sup>40</sup>                   | NS                                 | EN                    | 682        | 18         | 4.8      | TPN                   | 681        | 15         | 5.7      |
| Harvey et al 2014 <sup>41</sup>                 | NS                                 | EN                    | 1197       | 12         | 2        | TPN                   | 1191       | 11         | 2        |
| Hsu et al 2009 <sup>42 a</sup>                  | CDC                                | G feed                | 62         | 24         | 4.8      | SB feed               | 59         | 9          | 5.1      |
| Ibrahim et al 2002 <sup>43</sup>                | NS                                 | Early feed            | 75         | 49         | 12       | Late feed             | 75         | 31         | 11       |
| Kearns et al 2000 <sup>44 a</sup>               | NS                                 | G feed                | 23         | 13         | 22       | SB feed               | 21         | 19         | 14       |
| Laggner et al 1989 <sup>45 a</sup>              | NS                                 | ranitidine            | 16         | 13         | 19       | sucrulfate            | 16         | 6          | 6.3      |
| Montecalvo et al <sup>46</sup>                  | CDC                                | G feed                | 19         | 11         | 21       | SB feed               | 19         | 0          | 32       |
| Oudhuis et al <sup>47 a,d</sup>                 | CDC                                |                       |            |            |          | Probiotic             | 130        | 8          | 12       |
| Reignier et al <sup>48</sup>                    | NS                                 | SC                    | 222        | 16         | 4.1      | RGV                   | 227        | 17         | 7.5      |
| Spindler-Vessel et al 2007 <sup>49 a</sup>      | CDC                                | SC                    | 87         | 38         | 3.4      | Probiotic             | 26         | 15         | 0        |
| <b>Airway and oral-care-based interventions</b> |                                    |                       |            |            |          |                       |            |            |          |
| Camus et al 2005 <sup>50 a,e</sup>              | CDC                                |                       |            |            |          | Mup/Chlx              | 130        | 19         | 6.2      |
| De Riso et al 1996 <sup>51 a</sup>              | CDC                                |                       | 180        | 5          | 2.2      | Chlx                  | 173        | 1.7        | 1        |
| Fourrier et al 2000 <sup>52 a</sup>             | CDC                                | SC                    | 30         | 50         | 10       | Chlx                  | 30         | 17         | 10       |
| Fourrier et al 2005 <sup>53 a</sup>             | CDC                                | Placebo               | 114        | 11         | 2.6      | Chlx                  | 114        | 11         | 6.1      |
| Holzappel et al 1993 <sup>54</sup>              | NS                                 | NTI                   | 149        | 11         | 15       | OTI                   | 151        | 6          | 8.6      |
| Holzappel et al 1999 <sup>55 a</sup>            | NS                                 | SC                    | 200        | 26         | 23       | sinus CT              | 199        | 19         | 18       |
| Segers et al 2006 <sup>56 a</sup>               | CDC                                |                       | 469        | 16         | 3.6      | Chlx                  | 485        | 9.3        | 1.9      |
| Seguin et al 2013 <sup>57 a</sup>               | NS                                 | Placebo               | 72         | 28         | 8.5      | PVI                   | 78         | 31         | 3.5      |
| Valencia et al <sup>58 a</sup>                  | NS                                 | SC                    | 69         | 15         | 8.7      | CPC                   | 73         | 15         | 5.5      |

## Table S2 footnotes;

- a. The indicated studies were derived from the following systematic reviews;
  - Messori A, Trippoli S, Vaiani M, Gorini M, Corrado A. Bleeding and pneumonia in intensive care patients given ranitidine and sucralfate for prevention of stress ulcer: meta-analysis of randomised controlled trials. *BMJ* 2000;321:1103–1106.
  - Huang J, Cao Y, Liao C, Wu L, Gao F. Effect of histamine-2-receptor antagonists versus sucralfate on stress ulcer prophylaxis in mechanically ventilated patients: a meta-analysis of 10 randomized controlled trials. *Crit Care* 2010;14:R194.
  - Alhazzani W, Almasoud A, Jaeschke R, Lo BW, Sindi A, Altayyar S, Fox-Robichaud A. Small bowel feeding and risk of pneumonia in adult critically ill patients: a systematic review and meta-analysis of randomized trials. *Crit Care* 2013;17:R127;
  - Chan EY, Ruest A, Meade MO, Cook DJ. Oral decontamination for prevention of pneumonia in mechanically ventilated adults: systematic review and meta-analysis. *BMJ* 2007;334:889–900;
  - Labeau SO, Van de Vyver K, Brusselaers N, Vogelaers D, Blot SI. Prevention of ventilator-associated pneumonia with oral antiseptics: a systematic review and meta-analysis. *Lancet Infect Dis* 2011;11:845-854.
  - Petrof EO, Dhaliwal R, Manzanares W, Johnstone J, Cook D, Heyland DK. Probiotics in the critically ill: a systematic review of the randomized trial evidence. *Crit Care Med* 2012;40:3290-3302.
  - Liu KX, Zhu YG, Zhang J, Tao LL, Lee JW, Wang XD, Qu JM. Probiotics' effects on the incidence of nosocomial pneumonia in critically ill patients: a systematic review and meta-analysis. *Crit Care* 2012;16:R109.
  - Melsen WG, Rovers MM, Bonten MJM. Ventilator-associated pneumonia and mortality: A systematic review of observational studies. *Crit Care Med* 2009;37:2709–18.
  - Safdar N, Dezfulian C, Collard HR, Saint S. Clinical and economic consequences of ventilator-associated pneumonia: a systematic review. *Crit Care Med* 2005;33:2184–93.
- b. Bacteremia defining criteria: NA, not applicable, NS, not specified; CDC, Center for disease control definitions.
- c. Treatment abbreviations; G feed, feeding by the gastric route; SB feed, feeding by the small bowel route; EN, Enteral nutrition; TPN Total parenteral nutrition; SC, standard care; RGV, residual gastric volume monitoring; Mup, mupirocin nasal ointment; Chlx, chlorhexidene oral care; NTI, naso-tracheal intubation; OTI, oro-tracheal intubation; CPC, cuff pressure monitoring by automation.
- d. Oudhuis et al <sup>47</sup>; Non-concurrent control group of this study received SDD and is classified as an intervention group in Table S3.
- e. Camus et al <sup>50</sup>; Concurrent control group of this four arm study is classified in Table S4.

**Table S3: Studies of antibiotic based methods of VAP prevention (= SDD) – non-concurrent groups<sup>a</sup>**

|                                                                                          | Bacteremia definition <sup>b, c</sup> | Control groups |            |          | Intervention groups |            |            |          |
|------------------------------------------------------------------------------------------|---------------------------------------|----------------|------------|----------|---------------------|------------|------------|----------|
|                                                                                          |                                       | Group size     | VAP-IP (%) | B-IP (%) | Antibiotic          | Group size | VAP-IP (%) | B-IP (%) |
| <b>Non-concurrent groups; intervention groups received TAP alone<sup>d</sup></b>         |                                       |                |            |          |                     |            |            |          |
| Brun-Buisson et al 1989 <sup>59 a</sup>                                                  | CDC                                   | 124            | 15         | 18       |                     |            |            |          |
| de Smet et al (SOD) 2009 <sup>60 a,c</sup>                                               | Composite                             | 1990           | NA         | 9.3      | PTA                 | 1904       | NA         | 6.5      |
| Godard et al 1990 <sup>62 a</sup>                                                        | CDC                                   | 84             | 16         | 12       | PT                  | 97         | 2          | 10       |
| Nardi et al 2001 <sup>63</sup>                                                           | NS                                    |                |            |          | PTA                 | 104        | 19         | 13       |
| Nardi et al 2001 <sup>63</sup>                                                           | NS                                    |                |            |          | PTAM                | 119        | 8          | 15       |
| Oostdijk et al (SOD) 2014 <sup>63 c</sup>                                                | Composite                             |                |            |          | PTA                 | 5442       | NA         | 5.9      |
| <b>Non-concurrent groups; Intervention groups received both TAP and PPAP<sup>d</sup></b> |                                       |                |            |          |                     |            |            |          |
| Cerda et al 2007 <sup>64, c</sup>                                                        | MRSA                                  |                |            |          | PTA-Ctx             | 377        |            | 8.8      |
| Cerda et al 2007 <sup>64, c</sup>                                                        | MRSA                                  |                |            |          | PTAV-Ctx            | 165        |            | 1.1      |
| de Smet et al (SDD) 2009 <sup>60 a,c</sup>                                               | Composite                             |                |            |          | PTA-Ctx             | 2045       | NA         | 4.3      |
| Fox et al 1991 <sup>65 a</sup>                                                           | NS                                    | 12             | 66         | 8        | PTA-Ctx             | 12         | 50         | 8        |
| Hammond et al 1995 <sup>66</sup>                                                         | CDC                                   | 719            | 11         | 4.3      | PTA-Ctx             | 403        | 16         | 6.2      |
| Hammond et al 1995 <sup>66</sup>                                                         | CDC                                   | 406            | 14         | 5.4      |                     |            |            |          |
| Ledingham et al 1988 <sup>67 a</sup>                                                     | NS                                    | 161            | 11         | 6.8      | PTA-Ctx             | 163        | 2          | 4.9      |
| McClelland et al 1990 <sup>68 a</sup>                                                    | NS                                    | 12             | 50         | 25       | PTA-Ctx             | 15         | 7          | 20       |
| Oostdijk et al (SDD) 2014 <sup>63 c</sup>                                                | Composite                             |                |            |          | PTA-Ctx             | 5549       | NA         | 4.6      |
| Oudhuis et al 2011 <sup>47 a,e</sup>                                                     | CDC                                   |                |            |          | PGA-Ctx             | 124        | 7          | 13       |
| Silvestri et al 1999 <sup>69, c</sup>                                                    | CDC (PE)                              |                |            |          | PTA-Ctx             | 117        | 4.3        | 19.7     |
| Silvestri et al 2004 <sup>70</sup>                                                       | CDC                                   |                |            |          | PTA-Ctx             | 42         | 45         | 10       |
| Silvestri et al 2004 <sup>70</sup>                                                       | CDC                                   |                |            |          | PTAV-Ctx            | 42         | 52         | 7        |
| Stoutenbeek et al 1984 <sup>71 a</sup>                                                   | CDC                                   | 59             | 59         | 42       | PTA-Ctx             | 63         | 8          | 3.2      |
| Sydow et al 1990 <sup>72 a</sup>                                                         | NS                                    | 48             | 75         | 8.3      | PTA-Ctx             | 45         | 7          | 6.7      |
| Tissot vanPatot et al 1996 <sup>73</sup>                                                 | CDC                                   | 142            | 63         | 14.8     | PTA-Cef             | 142        | 20         | 6.5      |
| Viviani et al 2005 <sup>74, c</sup>                                                      | MRSA                                  |                |            |          | PTAV-Ctx            | 55         | NA         | 7.3      |
| Viviani et al 2005 <sup>74, c</sup>                                                      | MRSA                                  |                |            |          | PTAV-Ctx            | 50         | NA         | 8        |

## Table S3 footnotes;

- a. The indicated studies were derived from the following systematic reviews;
  - Hurley JC. Prophylaxis with enteral antibiotics in ventilated patients: selective decontamination or selective cross-infection? *Antimicrob Agents Chemother* 1995;39:941-7.
  - Pileggi C, Bianco A, Flotta D, Nobile CG, Pavia M. Prevention of ventilator-associated pneumonia, mortality and all intensive care unit acquired infections by topically applied antimicrobial or antiseptic agents: a meta-analysis of randomized controlled trials in intensive care units. *Crit Care* 2011;15:R155.
  - Silvestri L, Van Saene HKF, Milanese M, Gregori D, Gullo A. Selective decontamination of the digestive tract reduces bacterial bloodstream infection and mortality in critically ill patients. Systematic review of randomized, controlled trials. *J Hosp Infect* 2007;65:187-203.
  - Vandenbroucke-Grauls CM, Vandenbroucke JP. Effect of selective decontamination of the digestive tract on respiratory tract infections and mortality in the intensive care unit. *Lancet* 1991;338:859-862.
- b. Bacteremia defining criteria: NA, not applicable; NS, not specified; CDC, Center for disease control definitions; MRSA, methicillin resistant *Staphylococcus aureus*.
- c. The following studies were not evaluable for bacteremia incidence because of non-standard definitions of bacteremia;
  - Cerda et al <sup>64</sup> and Viviani et al <sup>74</sup> reported only MRSA bacteremias
  - de Smet et al <sup>60</sup> and Oostdijk et al <sup>63</sup> reported a composite of five bacteremia sub-types not including coagulase negative *Staphylococcus*.
  - Silvestri et al <sup>70</sup> reported number of bacteremia episodes.
- d. Abbreviations; TAP, topical antibiotic prophylaxis; PPAP, protocolized parenteral antibiotic prophylaxis
- e. Oudhuis et al <sup>47</sup>; Non-concurrent intervention group of this study received probiotic and is classified as an intervention group in Table S2.

**Table S4: Studies of antibiotic based methods of VAP prevention (= SDD) – RCCT's<sup>a</sup>**

|                                                                   | Bacteremia<br>definition <sup>b</sup> | Control groups |               |             | Intervention groups     |               |               |             |
|-------------------------------------------------------------------|---------------------------------------|----------------|---------------|-------------|-------------------------|---------------|---------------|-------------|
|                                                                   |                                       | Group<br>size  | VAP-IP<br>(%) | B-IP<br>(%) | Antibiotic <sup>c</sup> | Group<br>size | VAP-IP<br>(%) | B-IP<br>(%) |
| <b>RCCT's: intervention groups received TAP alone<sup>d</sup></b> |                                       |                |               |             |                         |               |               |             |
| Brun-Buisson et al 1989 <sup>59 a</sup>                           | CDC                                   | 50             | 12            | 10          | PNeNa                   | 36            | 8             | 19          |
| Barret et al 2001 <sup>75 a</sup>                                 | NS                                    | 12             | NA            | 17          | PTA                     | 11            | NA            | 36          |
| Camus et al 2005 <sup>50 a</sup>                                  | CDC                                   | 126            | 24            | 11          | PT                      | 130           | 12            | 10          |
| Garbino et al 2002 <sup>76</sup>                                  | CDC                                   |                |               |             | PNVfluc                 | 101           | 11            | 40          |
| Garbino et al 2002 <sup>76</sup>                                  | CDC                                   |                |               |             | PNV                     | 103           | 9             | 44          |
| Gaussorgues et al 1991 <sup>77 a</sup>                            | NS                                    | 59             | NA            | 24          | PGVA                    | 59            | NA            | 8.5         |
| Korinek et al 1993 <sup>78 a</sup>                                | CDC                                   | 60             | 42            | 10          | PTAV                    | 63            | 24            | 3.2         |
| Langlois-Karaga et al 1995 <sup>79</sup>                          | NS                                    | 50             | 56            | 46          | PGA                     | 47            | 30            | 23          |
| Quinio et al 1996 <sup>80 a</sup>                                 | NS                                    | 72             | 51            | 18          | PGA                     | 76            | 25            | 17          |
| Rodriguez_Roldan et al<br>1990 <sup>81 a</sup>                    | NS                                    | 17             | 65            | 12          | PTNeA                   | 14            | 29            | 0           |
| Ruza et al 1998 <sup>82 a</sup>                                   | CDC                                   | 110            | NA            | 14          | PTNy                    | 116           | NA            | 15          |
| Wiener et al 1995 <sup>83 a</sup>                                 | CDC                                   | 31             | 26            | 23          | PGNy                    | 30            | 27            | 23          |



**Table S4: RCCT's (Continued)**

|                                                         | Bacteremia definition <sup>b</sup> | Control groups |            |          | Intervention groups     |            |            |          |
|---------------------------------------------------------|------------------------------------|----------------|------------|----------|-------------------------|------------|------------|----------|
|                                                         |                                    | Group size     | VAP-IP (%) | B-IP (%) | Antibiotic <sup>c</sup> | Group size | VAP-IP (%) | B-IP (%) |
| <b>RCCT's intervention groups received TAP and PPAP</b> |                                    |                |            |          |                         |            |            |          |
| Aerdt et al 1991 <sup>84 a</sup>                        | CDC                                | 39             | 69         | 33       | PNoA-Ctx                | 17         | 6          | 5.9      |
| Blair et al 1991 <sup>85 a</sup>                        | NS                                 | 170            | 22         | 12       | PTA-Ctx                 | 161        | 7          | 3.7      |
| Cerra et al 1995 <sup>86 a, e</sup>                     | CDC (pe)                           | 21             | 71         | 57       | Ny-No                   | 25         | 48         | 20       |
| Cockerill et al 1992 <sup>87 a</sup>                    | NS                                 | 75             | 5          | 15       | PGNy-Ctx                | 75         | 4          | 5.3      |
| de le Cal et al 2005 <sup>88 a</sup>                    | CDC                                | 54             | 48         | 31       | PTA-Ctx                 | 53         | 34         | 36       |
| Finch et al 1991 <sup>89 a</sup>                        | NS                                 | 25             | 29         | 24       | PTA-Ctx                 | 24         | 20         | 8.3      |
| Flaherty et al 1990 <sup>90 a</sup>                     | NS                                 | 56             | 8.9        | 5.4      | PGNy-Cef                | 51         | 2          | 2        |
| Jacobs et al 1992 <sup>91</sup>                         | NS                                 | 46             | 9          | 16       | PTA-Ctx                 | 49         | 12         | 14       |
| Kerver et al 1988 <sup>92 a</sup>                       | NS                                 | 47             | 85         | 57       | PTA-Ctx                 | 49         | 12         | 31       |
| Krueger et al 2002 <sup>93 a</sup>                      | CDC                                | 262            | 11         | 13       | PG-Cip                  | 265        | 3          | 5.1      |
| Palomar et al 1997 <sup>94 a</sup>                      | CDC                                | 42             | 50         | 2.4      | PTA-Ctx                 | 41         | 17         | 4.9      |
| Rocha et al 1992 <sup>95 a</sup>                        | CDC                                | 54             | 46         | 19       | PTA-Ctx                 | 47         | 15         | 6.4      |
| Rolando et al 1993 <sup>96 a</sup>                      | CDC                                | 31             | 36         | 23       | PTA-Ctx                 | 28         | 29         | 3.6      |
| Sanchez-Garcia et al 1998 <sup>97 a</sup>               | NS                                 | 140            | 41         | 16       | PTA-Ctx                 | 131        | 29         | 11.5     |
| Stoutenbeek et al 2007 <sup>98 a</sup>                  | NS                                 | 200            | 23         | 16       | PTA-Ctx                 | 201        | 10         | 15.4     |
| Ulrich et al 1989 <sup>99 a</sup>                       | NS                                 | 52             | 50         | 35       | PNoA-Tr                 | 48         | 15         | 23       |
| Verwaest et al 1997 <sup>100 a</sup>                    | CDC                                | 185            | 22         | 16       | OA-O                    | 193        | 11         | 11       |
| Verwaest et al 1997 <sup>100 a</sup>                    | CDC                                |                |            |          | PTA-Ctx                 | 200        | 16         | 19       |
| Zobel et al 1991 <sup>101</sup>                         | NS                                 | 25             | NA         | 12       | PGA-Ctx                 | 25         | NA         | 4        |

Table S4 footnotes;

a. The indicated studies were derived from the following systematic reviews;

- Liberati A, D'Amico R, Pifferi S, Torri V, Brazzi L, Parmelli E. Antibiotic prophylaxis to reduce respiratory tract infections and mortality in adults receiving intensive care (Review). *Cochrane Database Syst Rev* 2009; CD000022.
- Pileggi C, Bianco A, Flotta D, Nobile CG, Pavia M. Prevention of ventilator-associated pneumonia, mortality and all intensive care unit acquired infections by topically applied

antimicrobial or antiseptic agents: a meta-analysis of randomized controlled trials in intensive care units. *Crit Care* 2011;15:R155.

- Silvestri L, Van Saene HKF, Milanese M, Gregori D, Gullo A. Selective decontamination of the digestive tract reduces bacterial bloodstream infection and mortality in critically ill patients. Systematic review of randomized, controlled trials. *J Hosp Infect* 2007; 65:187-203.
- b. Bacteremia defining criteria: NA, not applicable, NS, not specified; CDC, Center for disease control definitions; pe per episode.
- c. Treatment abbreviations
- letters before the hyphen referring to topical components; Pl, topical placebo; P, topical polymyxin; T, topical tobramycin; A, topical amphotericin; No, topical norfloxacin; G, topical gentamicin; Cip, topical ciprofloxacin, V, topical vancomycin; Ny, topical nystatin; Ne, topical neomycin; Na, topical nalidixic acid; No, topical norfloxacin; O, topical oflaxcin;
  - letters after the hyphen refer to parenteral components; -Cef, Cefazolin; -Ctx, systemic cefotaxime; -Cip, systemic ciprofloxacin; -V, systemic vancomycin; -No, systemic norfloxacin; -Tr, systemic trimethoprim; -O, systemic oflaxcin; -Cz, systemic ceftazidime.
- d. Abbreviations; TAP, topical antibiotic prophylaxis; PPAP, protocolized parenteral antibiotic prophylaxis
- e. The following study was not evaluable because the bacteremia incidence was reported as number of bacteremia episodes; Cerra et al 1995<sup>86</sup>

**Table S5: Studies of antibiotic based methods of VAP prevention (= SDD) RCCT's - Duplex groups <sup>a</sup>**

|                                                                                                           | Bacteremia definition <sup>b</sup> | Control groups          |            |            |          | Intervention groups     |            |            |          |
|-----------------------------------------------------------------------------------------------------------|------------------------------------|-------------------------|------------|------------|----------|-------------------------|------------|------------|----------|
|                                                                                                           |                                    | Antibiotic <sup>c</sup> | Group size | VAP-IP (%) | B-IP (%) | Antibiotic <sup>c</sup> | Group size | VAP-IP (%) | B-IP (%) |
| <b>RCCT's: control groups received PPAP alone; intervention groups received TAP and PPAP <sup>d</sup></b> |                                    |                         |            |            |          |                         |            |            |          |
| Arnou et al <sup>102 a</sup>                                                                              | CDC                                | Ctx                     | 38         | NA         | 12       | PTNy-Ctx                | 48         | NA         | 3        |
| Bion et al 1991 <sup>103 a</sup>                                                                          | NS                                 | Ctx&Amp                 | 31         | 26         | 3.2      | PTA-Ctx                 | 21         | 0          | 9.5      |
| Ferrer et al 1994 <sup>104 a</sup>                                                                        | NS                                 | Ctx                     | 50         | 24         | 4        | PTA-Ctx                 | 51         | 18         | 3.9      |
| Georges et al 1994 <sup>105 a</sup>                                                                       | NS                                 | Amx-Clav                | 33         | 46         | 24       | PNA-AmxClav             | 31         | 10         | 19       |
| Hammond et al 1992 <sup>106 a</sup>                                                                       | NS                                 | Ctx                     | 160        | 6          | 5.6      | PTA-Ctx                 | 162        | 7          | 4.9      |
| Hartenaeur et al 1991 <sup>107 a</sup>                                                                    | CDC                                | Ctx                     | 61         | 46         | 6.6      | PTA-Ctx                 | 50         | 10         | 6        |
| Hartenaeur et al 1991 <sup>107 a</sup>                                                                    | CDC                                | Ctx                     | 40         | 45         | 7.5      | PTA-Ctx                 | 49         | 10         | 16       |
| Hellinger et al 2002 <sup>108 a</sup>                                                                     | NS                                 | Ctz                     | 43         | NA         | 2.3      | PGNy-Ctx                | 37         | NA         | 5.4      |
| Laggner et al 1994 <sup>109 a</sup>                                                                       | NS                                 | Amx-Clav                | 34         | 12         | 2.9      | GA-AmxClav              | 33         | 3          | 9.1      |
| Palomar et al 1997 <sup>94 a</sup>                                                                        | CDC                                | Ctx                     | 46         | 30         | 0        | PTA-Ctx                 | 41         | 17         | 4.9      |
| Rolando et al 1996 <sup>110 a</sup>                                                                       | CDC                                | CtzFlx                  | 61         | NA         | 13       | PTA-CtzFlx              | 47         | NA         | 4.3      |
| Stoutenbeek et al 1996 <sup>111 a</sup>                                                                   | NS                                 | Ctx                     | 42         | 19         | 26       | PTA-Ctx                 | 49         | 4          | 18       |
| Tetteroo et al 1990 <sup>112 a</sup>                                                                      | NS                                 | Ctx                     | 58         | 14         | 1.7      | PTA-Ctx                 | 56         | 2          | 1.8      |

Table S5 footnotes;

a. The indicated studies were derived from the following systematic reviews;

- Liberati A, D'Amico R, Pifferi S, Torri V, Brazzi L, Parmelli E. Antibiotic prophylaxis to reduce respiratory tract infections and mortality in adults receiving intensive care (Review). *Cochrane Database Syst. Rev.* 2009; CD000022;
- Chan EY, Ruest A, Meade MO, Cook DJ. Oral decontamination for prevention of pneumonia in mechanically ventilated adults: systematic review and meta-analysis. *BMJ.* 2007;334:889–900.
- Pileggi C, Bianco A, Flotta D, Nobile CG, Pavia M. Prevention of ventilator-associated pneumonia, mortality and all intensive care unit acquired infections by topically applied antimicrobial or antiseptic agents: a meta-analysis of randomized controlled trials in intensive care units. *Crit Care* 2011;15, R155.

- Melsen WG, Rovers MM, Bonten MJM. Ventilator-associated pneumonia and mortality: A systematic review of observational studies. *Crit Care Med.* 2009;37:2709–18.
  - Safdar N, Dezfulian C, Collard HR, Saint S. Clinical and economic consequences of ventilator-associated pneumonia: a systematic review. *Crit Care Med.* 2005;33:2184–93
  - Silvestri L, Van Saene HKF, Milanese M, Gregori D, Gullo A. Selective decontamination of the digestive tract reduces bacterial bloodstream infection and mortality in critically ill patients. Systematic review of randomized, controlled trials. *J Hosp Infect* 2007; 65:187-203.
- b. Bacteremia defining criteria: NA, not applicable, NS, not specified; CDC, Center for disease control definitions.
- c. Treatment abbreviations
- letters before the hyphen referring to topical components; Pl, topical placebo; P, topical polymyxin; T, topical tobramycin; A, topical amphotericin; No, topical norfloxacin; G, topical gentamicin; Cip, topical ciprofloxacin, V, topical vancomycin; Ny, topical nystatin; Ne, topical neomycin; Na, topical nalidixic acid; No, topical norfloxacin; O, topical ofloxacin;
  - letters after the hyphen refer to parenteral components; - Amx-Clav, amoxicillin-clavulinate; -Ctx, systemic cefotaxime; -Cip, systemic ciprofloxacin; -V, systemic vancomycin; -Cip, systemic ciprofloxacin; -Tr, systemic trimethoprim; -O, systemic ofloxacin; -Cz, systemic ceftazidime.
- d. Abbreviations; TAP, topical antibiotic prophylaxis; PPAP, protocolized parenteral antibiotic prophylaxis.

**Table S6: Numbers of Coagulase negative Staphylococcus (CNS) bacteremia isolates <sup>a</sup>**

| Study                                     | Group type <sup>b</sup> | Total number of bacteremia isolates | CNS isolates |         | Pseudomonas isolates |         |
|-------------------------------------------|-------------------------|-------------------------------------|--------------|---------|----------------------|---------|
|                                           |                         |                                     | Number       | Percent | Number               | Percent |
| <b>From Table S1</b>                      |                         |                                     |              |         |                      |         |
| Cade et al 1993 <sup>4</sup>              | B                       | 8                                   | 1            | 12.5    | 2                    | 25      |
| Craven et al 1988 <sup>5</sup>            | B                       | 25                                  | 0            | 0       | 1                    | 4       |
| Craven et al 1988 <sup>5</sup>            | B                       | 66                                  | 11           | 16.7    | 6                    | 9       |
| El-Masri et al 2004 <sup>6</sup>          | B                       | 40                                  | 6            | 15      | 1                    | 3       |
| Garrouste-Orgeas et al 2000 <sup>10</sup> | B                       | 33                                  | 12           | 36.4    | 12                   | 36      |
| Garrouste-Orgeas et al 2006 <sup>11</sup> | B                       | 232                                 | 50           | 21.6    | 19                   | 8       |
| Ibrahim et al 2000 <sup>18</sup>          | B                       | 339                                 | 96           | 28.3    | 22                   | 6       |
| Kollef et al 1997 <sup>20</sup>           | B                       | 14                                  | 0            | 0       | 2                    | 14      |
| Kollef et al 1997 <sup>20</sup>           | B                       | 9                                   | 0            | 0       | 1                    | 11      |
| Kunac et al 2013 <sup>21</sup>            | B                       | 26                                  | 0            | 0       | 2                    | 8       |
| Laupland et al 2002 <sup>22</sup>         | B                       | 66                                  | 9            | 14      | 2                    | 3       |
| Laupland et al 2004 <sup>23</sup>         | B                       | 244                                 | 28           | 11.4    | 11                   | 5       |
| Magnason et al 2008 <sup>24</sup>         | B                       | 28                                  | 9            | 32.1    | 0                    | 0       |
| Osmon et al 2008 <sup>26</sup>            | B                       | 131                                 | 17           | 13      | 9                    | 7       |
| Urli et al 2002 <sup>35</sup>             | B                       | 46                                  | 11           | 23.9    | 3                    | 7       |
| <b>From Table S2</b>                      |                         |                                     |              |         |                      |         |
| Fourrier et al 2000 <sup>52</sup>         | C & I                   | 6                                   | 2            | 33.3    | 0                    | 0       |
| Fourrier et al 2005 <sup>53</sup>         | C & I                   | 10                                  | 5            | 50      | 1                    | 10      |
| <b>From Table S3</b>                      |                         |                                     |              |         |                      |         |
| Silvestri et al 1999 <sup>69</sup>        | I                       | 23                                  | 9            | 39.1    | 0                    | 0       |
| Stoutenbeek et al 1984 <sup>71</sup>      | C                       | 13                                  | 0            | 0       | 1                    | 8       |
| <b>From Table S4</b>                      |                         |                                     |              |         |                      |         |
| Quinio et al 1996 <sup>80</sup>           | C                       | 13                                  | 3            | 23      | 0                    | 0       |
| Cerra et al 1995 <sup>86</sup>            | C                       | 12                                  | 6            | 50      | 1                    | 8       |
| de le Cal et al 2005 <sup>88</sup>        | C                       | 23                                  | 2            | 8.6     | 23                   | 100     |
| Rocha et al 1992 <sup>95</sup>            | C                       | 10                                  | 2            | 20      | 1                    | 10      |
| Rolando et al 1993 <sup>96</sup>          | C                       | 7                                   | 2            | 29      | 0                    | 0       |
| Stoutenbeek et al 2007 <sup>98</sup>      | C                       | 29                                  | 12           | 41      | 2                    | 7       |
| Verwaest et al 1997 <sup>113</sup>        | C                       | 32                                  | 7            | 21      | 1                    | 3       |
| Garbino et al 2003 <sup>76</sup>          | I                       | 108                                 | 52           | 48      | NA                   | NA      |
| Quinio et al 1996 <sup>80</sup>           | I                       | 13                                  | 2            | 15      | 0                    | 0       |
| Cerra et al 1995 <sup>86</sup>            | I                       | 6                                   | 1            | 17      | 1                    | 17      |
| de le Cal et al 2005 <sup>88</sup>        | I                       | 36                                  | 7            | 19.4    | 36                   | 100     |
| Rocha et al 1992 <sup>95</sup>            | I                       | 3                                   | 1            | 33      | 0                    | 0       |
| Rolando et al 1993 <sup>96</sup>          | I                       | 2                                   | 1            | 50      | 1                    | 100     |
| Stoutenbeek et al 2007 <sup>98</sup>      | I                       | 26                                  | 9            | 35      | 3                    | 12      |
| Verwaest et al 1997 <sup>113</sup>        | I                       | 17                                  | 3            | 18      | 2                    | 12      |
| Verwaest et al 1997 <sup>113</sup>        | I                       | 50                                  | 13           | 26      | 6                    | 12      |

**Table S6: Numbers of Coagulase negative Staphylococcus (CNS) bacteremia isolates (continued) <sup>a</sup>**

| Study                                | Group type <sup>b</sup> | Total number of bacteremia isolates | CNS isolates |         | Pseudomonas isolates |         |
|--------------------------------------|-------------------------|-------------------------------------|--------------|---------|----------------------|---------|
|                                      |                         |                                     | Number       | Percent | Number               | Percent |
| From Table S5                        |                         |                                     |              |         |                      |         |
| Hartenaeur et al 1991 <sup>107</sup> | C                       | 11                                  | 3            | 27      | 1                    | 9       |
| Hartenaeur et al 1991 <sup>107</sup> | I                       | 7                                   | 1            | 14      | 1                    | 14      |
| Rolando et al 1996 <sup>110</sup>    | C                       | 8                                   | 2            | 25      | 0                    | 0       |
| Rolando et al 1996 <sup>110</sup>    | I                       | 2                                   | 2            | 100     | 0                    | 0       |

Table S6 footnotes;

- a. All studies used CDC defining criteria for bacteremia
- b. Group type abbreviations; B benchmark; C control; I intervention; C & I control and intervention groups combined

#### References

1. Apostolopoulou E, Bakakos P, Katostaras T, Gregorakos L: **Incidence and risk factors for ventilator-associated pneumonia in 4 multidisciplinary intensive care units in Athens, Greece.** *Respir Care* 2003, **48**:681-688.
2. Berg DE, Hershov RC, Ramirez CA, Weinstein RA: **Control of nosocomial infections in an intensive care unit in Guatemala City.** *Clin Infect Dis* 1995, **21**:588-593.
3. Bonten MJ, Froom AH, Gaillard CA, Greve JWM, de Leeuw PW, Drent M, Buurman WA: **The systemic inflammatory response in the development of ventilator-associated pneumonia.** *Am J Respir Crit Care Med* 1997, **156**:1105-1113.
4. Cade JF, McOwat E, Sigantoria R, Keighley C, Presneill J, Sinickas V: **Uncertain relevance of gastric colonization in the seriously ill.** *Intensive Care Med* 1992, **18**:210-7.
5. Craven DE, Kunches LM, Lichtenberg DA, Kollisch NR, Barry MA, Heeren TC, McCabe WR: **Nosocomial infection and fatality in medical and surgical intensive care unit patients.** *Arch Intern Med* 1988, **148**:1161-8.
6. El-Masri MM, Hammad TA, McLeskey SW, Joshi M, Korniewicz DM: **Predictors of nosocomial bloodstream infections among critically ill adult trauma patients.** *Infect Control Hosp Epidemiol* 2004, **25**:656-663.
7. Fagon JY, Chastre J, Domart Y, Trouillet JL, Pierre J, Darne C, Gibert C: **Nosocomial pneumonia in patients receiving continuous mechanical ventilation. Prospective analysis of 52 episodes**

**with use of a protected specimen brush and quantitative culture techniques.** *Am Rev Respir Dis* 1989, **139**:877-884.

8. Fagon JY, Chastre J, Vuagnat A, Trouillet JL, Novara A, Gibert C: **Nosocomial pneumonia and mortality among patients in intensive care units.** *JAMA* 1996, **275**:866-869.
9. Fieselmann JF, Bock MJ, Hendryx MS, Wakefield D, Helms CM, Bentler SE: **Mechanical ventilation in rural ICUs.** *Crit Care* 1999, **3**:23-31.
10. Garrouste-Orgeas M, Chevret S, Mainardi JL, Timsit JF, Misset B, Carlet J: **A one-year prospective study of nosocomial bacteraemia in ICU and non-ICU patients and its impact on patient outcome.** *J Hosp Infect* 2000, **44**:206-213.
11. Garrouste-Orgeas M, Timsit JF, Tafflet M, Misset B, Zahar JR, Soufir L, Carlet J: **Excess risk of death from intensive care unit—acquired nosocomial bloodstream infections: a reappraisal.** *Clin Infect Dis* 2006, **42**:1118-1126.
12. George DL, Falk PS, Wunderink RG, Leeper Jr KV, Meduri GU, Steere EL, Glen Mayhall C: **Epidemiology of ventilator-acquired pneumonia based on protected bronchoscopic sampling.** *Am J Respir Crit Care Med* 1998, **158**:1839-1847.
13. Giard M, Lepape A, Allaouchiche B, Guerin C, Lehot JJ, Robert MO, Vanhems P: **Early-and late-onset ventilator-associated pneumonia acquired in the intensive care unit: comparison of risk factors.** *J Crit Care* 2008, **23**:27-33.
14. Girou E, Schortgen F, Delclaux C, Brun-Buisson C, Blot F, Lefort Y, Brochard L: **Association of noninvasive ventilation with nosocomial infections and survival in critically ill patients.** *JAMA* 2000, **284**:2361-2367.
15. Guimaraes MM, Rocco JR: **Prevalence of ventilator-associated pneumonia in a university hospital and prognosis for the patients affected.** *J Bras Pneumol* 2006, **32**:339–346.
16. Hébert PC, Wells G, Blajchman MA, Marshall J, Martin C, Pagliarello G, Yetisir E: **A multicenter, randomized, controlled clinical trial of transfusion requirements in critical care.** *New Engl J Med* 1999, **340**:409-417.
17. Hugonnet S, Eggimann P, Borst F, Maricot P, Chevrolet JC, Pittet D: **Impact of ventilator-associated pneumonia on resource utilization and patient outcome.** *Infect Control Hosp Epidemiol* 2004, **25**:1090-6.
18. Ibrahim EH, Ward S, Sherman G, Kollef MH: **A comparative analysis of patients with early-onset vs late-onset nosocomial pneumonia in the ICU setting.** *Chest* 2000, **117**:1434-1442.
19. Jacobs S, Chang RW, Lee B, Bartlett FW: **Continuous enteral feeding: a major cause of pneumonia among ventilated intensive care unit patients.** *JPEN J Parenter Enteral Nutr* 1990, **14**:353-6.
20. Kollef MH, Vlasnik J, Sharpless L, Pasque C, Murphy D, Fraser V: **Scheduled change of antibiotic classes A strategy to decrease the incidence of ventilator-associated pneumonia.** *Am J Respir Crit Care Med* 1997, **156**:1040–1048.
21. Kunac A, Sifri ZC, Mohr AM, Horng H, Lavery RF, Livingston DH: **Bacteremia and Ventilator-Associated Pneumonia: A Marker for Contemporaneous Extra-Pulmonic Infection.** *Surgical Infections* 2014, **15**:77-83.
22. Laupland KB, Zygun DA, Davies HD, Church DL, Louie TJ, Doig CJ: **Population-based assessment of intensive care unit-acquired bloodstream infections in adults: incidence, risk factors, and associated mortality rate.** *Crit Care Med* 2002, **30**:2462-2467.

23. Laupland KB, Kirkpatrick AW, Church DL, Ross T, Gregson DB: **Intensive-care-unit-acquired bloodstream infections in a regional critically ill population.** *J Hosp Infect* 2004, **58**(2), 137-145.
24. Magnason S, Kristinsson KG, Stefansson T, Erlendsdottir H, Jonsdottir K, Kristjansson M, Gudmundsson S: **Risk factors and outcome in ICU - acquired infections.** *Acta Anaesthesiologica Scandinavica* 2008, **52**:1238-1245.
25. Nouridine K, Combes P, Carton MJ, Beuret P, Cannamela A, Ducreux JC : **Does noninvasive ventilation reduce the ICU nosocomial infection risk? A prospective clinical survey.** *Intensive Care Med* 1999, **25**:567-573.
26. Osmon S, Warren D, Seiler SM, Shannon W, Fraser VJ, Kollef MH: **The influence of infection on hospital mortality for patients requiring >48 h of intensive care.** *Chest* 2003, **124**:1021-1029.
27. Potgieter PD, Linton DM, Oliver S, Forder AA: **Nosocomial infections in a respiratory intensive care unit.** *Crit Care Med* 1987, **15**:495-498.
28. Rello J, Ricart M, Mirelis B, Quintana E, Gurgui M, Net A, Prats, G: **Nosocomial bacteremia in a medical-surgical intensive care unit: epidemiologic characteristics and factors influencing mortality in 111 episodes.** *Intensive Care Med* 1994, **20**:94-98.
29. Reusser P, Zimmerli W, Scheidegger D, Marbet GA, Buser M, Gyr K: **Role of gastric colonization in nosocomial infections and endotoxemia: a prospective study in neurosurgical patients on mechanical ventilation.** *J Infect Dis* 1989, **160**:414-421.
30. Salata RA, Lederman MM, Shlaes DM, Jacobs MR, Eckstein E, Tweardy D, Toossi Z, Chmielewski R, Marino J, King CH: **Diagnosis of nosocomial pneumonia in intubated, intensive care unit patients.** *Am Rev Respir Dis* 1987, **135**:426-432.
31. Shorr AF, Duh MS, Kelly KM, Kollef MH: **Red blood cell transfusion and ventilator-associated pneumonia: a potential link?** *Crit Care Med* 2004, **32**:666-674.
32. Shorr AF, Jackson WL, Kelly KM, Fu M, Kollef MH: **Transfusion Practice and Blood Stream Infections in Critically Ill Patients.** *Chest* 2005, **127**:1722-1728.
33. Sofianou DC, Constandinidis TC, Yannacou M, Anastasiou H, Sofianos E: **Analysis of risk factors for ventilator-associated pneumonia in a multidisciplinary intensive care unit.** *Eur J Clin Microbiol Infect Dis* 2000, **19**:460-463.
34. Torres A, Aznar R, Gatell JM, Jimenez P, Gonzalez J, Ferrer A, Celis R, Rodriguez-Roisin R: **Incidence, risk, and prognosis factors of nosocomial pneumonia in mechanically ventilated patients.** *Am Rev Respir Dis* 1990, **142**:523-528.
35. Urli T, Perone G, Acquarolo A, Zappa S, Antonini B, Ciani A: **Surveillance of infections acquired in intensive care: usefulness in clinical practice.** *J Hosp Infect* 2002, **52**:130-5.
36. Violan JS, Sanchez-Ramirez C, Mujica AP, Cendrero JC, Fernandez JA, de Castro FR: **Impact of nosocomial pneumonia on the outcome of mechanically-ventilated patients.** *Crit Care (Lond)* 1998, **2**:19-23.
37. Acosta-Escribano J, Fernández-Vivas M, Carmona TG, Caturla-Such J, Garcia-Martinez M, Menendez-Mainer A, Sanchez-Payá J: **Gastric versus transpyloric feeding in severe traumatic brain injury: a prospective, randomized trial.** *Intensive Care Med* 2010, **36**:1532-1539.
38. Barraud D, Blard C, Hein F, Marçon O, Cravoisy A, Nace L, Alla F, Bollaert PE, Gibot S: **Probiotics in the critically ill patient: a double blind, randomized, placebo-controlled trial.** *Intensive Care Med* 2010, **36**:1540-1547.



39. Bonten MJ, Gaillard CA, Van der Geest S, Van Tiel FH, Beysens AJ, Smeets HG, Stobberingh EE: **The role of intragastric acidity and stress ulcer prophylaxis on colonization and infection in mechanically ventilated ICU patients. A stratified, randomized, double-blind study of sucralfate versus antacids.** *Am J Respir Crit Care Med* 1995, **152**:1825-1834.
40. Doig GS, Simpson F, Sweetman EA, Finfer SR, Cooper DJ, Heighes PT, Peake S: **Early parenteral nutrition in critically ill patients with short-term relative contraindications to early enteral nutrition: a randomized controlled trial.** *JAMA* 2013, **309**:2130-2138.
41. Harvey SE, Parrott F, Harrison DA, Bear DE, Segaran E, Beale R, Bellingan G, Leonard R, Mythen MG, Rowan KM: **Trial of the Route of Early Nutritional Support in Critically Ill Adults.** *New England Journal of Medicine* 2014, **371**:1673-1684.
42. Hsu CW, Sun SF, Lin SL, Kang SP, Chu KA, Lin CH, Huang HH: **Duodenal versus gastric feeding in medical intensive care unit patients: a prospective, randomized, clinical study.** *Crit Care Med* 2009, **37**:1866-1872.
43. Ibrahim EH, Mehringer L, Prentice D, Sherman G, Schaiff R, Fraser V, Kollef MH: **Early versus late enteral feeding of mechanically ventilated patients: Results of a clinical trial.** *JPEN J Parenter Enteral Nutr* 2002, **26**:174-181.
44. Kearns PJ, Chin D, Mueller L, Wallace K, Jensen WA, Kirsch CM: **The incidence of ventilator-associated pneumonia and success in nutrient delivery with gastric versus small intestinal feeding: a randomized clinical trial.** *Crit Care Med* 2000, **28**:1742-1746.
45. Laggner AN, Lenz K, Base W, Druml W, Schneeweiss B, Grimm G: **Prevention of upper gastrointestinal bleeding in long-term ventilated patients. Sucralfate versus ranitidine.** *Am J Med* 1989, **86**:81-4.
46. Montecalvo MA, Steger KA, Farber HW: **Nutritional outcome and pneumonia in critical care patients randomized to gastric versus jejunal tube feedings. The Critical Care Research Team.** *Crit Care Med* 1992, **20**:1377-1387.
47. Oudhuis GJ, Bergmans DC, Dormans T, Zwaveling JH, Kessels A, Prins MH, Verbon A: **Probiotics versus antibiotic decontamination of the digestive tract: infection and mortality.** *Intensive Care Med* 2011, **37**:110-117.
48. Reignier J, Mercier E, Le Gouge A, Boulain T, Desachy A, Bellec F, Lascarrou JB: **Effect of Not Monitoring Residual Gastric Volume on Risk of Ventilator-Associated Pneumonia in Adults Receiving Mechanical Ventilation and Early Enteral Feeding. A Randomized Controlled Trial.** *JAMA* 2013, **309**:249-256.
49. Spindler-Vesel A, Bengmark S, Vovk I, Cerovic O, Kompan L: **Synbiotics, prebiotics, glutamine, or peptide in early enteral nutrition: a randomized study in trauma patients.** *J Parenter Enteral Nutr* 2007, **31**:119-126.
50. Camus C, Bellissant E, Sebille V, Perrotin D, Garo B, Legras A, Renault A, Le Corre P, Donnio PY, Gacouin A: **Prevention of acquired infections in intubated patients with the combination of two decontamination regimens.** *Crit Care Med* 2005, **33**:307-314.
51. DeRiso AJ, Ladowski JS, Dillon TA, Justice JW, Peterson AC: **Chlorhexidine gluconate 0.12% oral rinse reduces the incidence of total nosocomial respiratory infection and nonprophylactic systemic antibiotic use in patients undergoing heart surgery.** *Chest* 1996, **109**:1556-1561.
52. Fourrier FE, Cau-Pottier H, Boutigny M, Roussel-Delvallez M, Jourdain, Chopin C: **Effects of dental plaque antiseptic decontamination on bacterial colonization and nosocomial infections in critically ill patients.** *Intensive Care Med* 2000, **26**:1239-1247.

53. Fourrier F, Dubois D, Pronnier P, Herbecq P, Leroy O, Desmettre T, Roussel-Delvallez M: **Effect of gingival and dental plaque antiseptic decontamination on nosocomial infections acquired in the intensive care unit a double-blind placebo-controlled multicenter study.** *Crit Care Med* 2005, **33**:1728-1735.
54. Holzapfel L, Chevret S, Madinier G, Ohen F, Demingeon G, Coupry A, Chaudet M: **Influence of long-term oro- or nasotracheal intubation on nosocomial maxillary sinusitis and pneumonia: results of a prospective, randomized, clinical trial.** *Crit Care Med* 1993, **21**:1132-1138.
55. Holzapfel L, Chastang C, Demingeon G, Bohe J, Piralla B, Coupry A: **A randomized study assessing the systematic search for maxillary sinusitis in nasotracheally mechanically ventilated patients. Influence of nosocomial maxillary sinusitis on the occurrence of ventilator-associated pneumonia.** *Am J Respir Crit Care Med* 1999, **159**:695-701.
56. Segers P, Speekenbrink RG, Ubbink DT, van Ogtrop ML, Bas A: **Prevention of nosocomial infection in cardiac surgery by decontamination of the nasopharynx and oropharynx with chlorhexidine gluconate.** *JAMA* 2006, **296**:2460-2466.
57. Seguin P, Tanguy M, Laviolle B, Tirel O, Malledant Y: **Effect of oropharyngeal decontamination by povidone-iodine on ventilator-associated pneumonia in patients with head trauma.** *Crit Care Med* 2006, **34**:1514-1519.
58. Valencia M, Ferrer M, Farre R, Navajas D, Badia JR, Nicolas JM, Torres A: **Automatic control of tracheal tube cuff pressure in ventilated patients in semirecumbent position: A randomized trial.** *Crit Care Med* 2007, **35**:1543-1549.
59. Brun-Buisson C, Legrand P, Rauss A, Richard C, Montravers F, Besbes M, Meakins JL, Soussy CJ, Lemaire F: **Intestinal decontamination for control of nosocomial multiresistant gram-negative bacilli. Study of an outbreak in an intensive care unit.** *Ann Intern Med* 1989, **110**:873-881.
60. de Smet AMGA, Kluytmans JAJW, Cooper BS, Mascini EM, Benus RFJ, van der Werf TS, van der Hoeven JG, Pickkers P, Bogaers-Hofman D, van der Meer NJ, Bernards AT, Kuijper EJ, Joore JC, Leverstein-van Hall MA, Bindels AJ, Jansz AR, Wesselink RM, de Jongh BM, Dennesen PJ, van Asselt GJ, te Velde LF, Frenay IH, Kaasjager K, Bosch FH, van Iterson M, Thijsen SF, Kluge GH, Pauw W, de Vries JW, Kaan JA, Arends JP, Aarts LP, Sturm PD, Harinck HI, Voss A, Uijtendaal EV, Blok HE, Thieme Groen ES, Pouw ME, Kalkman CJ, Bonten MJ: **Decontamination of the digestive tract and oropharynx in ICU patients.** *N Engl J Med* 2009, **360**:20-31.
61. Godard J, Guillaume C, Reverdy ME, Bachmann P, Bui-Xuan B, Nageotte A, Motin J: **Intestinal decontamination in a polyvalent ICU. A double-blind study.** *Intensive Care Med* 1990, **16**:307-311.
62. Nardi G, Di Silvestre A, De Monte A, Massarutti D, Proietti A, Troncon MG, Zussino M: **Reduction in gram-positive pneumonia and antibiotic consumption following the use of a SDD protocol including nasal and oral mupirocin.** *Eur J Emerg Med* 2001, **8**:203-214.
63. Oostdijk EA, Kesecioglu J, Schultz MJ, Visser CE, de Jonge E, van Essen EH, Bernards AT, Purmer I, Brimicombe R, Bergmans D, van Tiel F, Bosch FH, Mascini E, van Griethuysen A, Bindels A, Jansz A, van Steveninck FAL, van der Zwet WC, Fijen JW, Thijsen S, de Jong R, Oudbier J, Raben A, van der Vorm E, Koeman M, Rothbarth P, Rijkeboer A, Gruteke P, Hart-Sweet H, Peerbooms P, Winsser LJ, van Elsacker-Niele AMW, Demmendaal K, Brandenburg A, de Smet AMGA, Bonten MJM: **Effects of decontamination of the oropharynx and intestinal tract on antibiotic resistance in ICUs: a randomized clinical trial.** *JAMA* 2014, **312**:1429-1437.

64. Cerdá E, Abella A, Miguel A, Lorente JA, García-Hierro P, van Saene HK, Alia A, Aranguren A: **Enteral vancomycin controls methicillin-resistant *Staphylococcus aureus* endemicity in an intensive care burn unit: a 9-year prospective study.** *Ann Surg* 2007, **245**:397-407.
65. Fox MA, Peterson S, Fabri BM, Van Saene HK, Williets T: **Selective decontamination of the digestive tract in cardiac surgical patients.** *Crit Care Med* 1991, **19**:1486-90.
66. Hammond JM, Potgieter PD: **Long-term effects of selective decontamination on antimicrobial resistance.** *Crit Care Med* 1995, **23**:637-45.
67. Ledingham I, Eastaway A, McKay I, Alcock S, McDonald J, Ramsay G: **Triple regimen of selective decontamination of the digestive tract, systemic cefotaxime, and microbiological surveillance for prevention of acquired infection in intensive care.** *Lancet* 1988, **1**:785-90.
68. McClelland P, Murray AE, Williams PS, van Saene HK, Gilbertson AA, Mostafa SM, Bone JM: **Reducing sepsis in severe combined acute renal and respiratory failure by selective decontamination of the digestive tract.** *Crit Care Med* 1990, **18**:935-9.
69. Silvestri L, Bragadin CM, Milanese M, Gregori D, Consales C, Gullo A, van Saene HFK: **Are most ICU infections really nosocomial? A prospective observational cohort study in mechanically ventilated patients.** *J Hosp Infect* 1999, **42**:125-133.
70. Silvestri L, Van Saene HFK, Milanese M, Fontana F, Gregori D, Oblach L, Blazic M: **Prevention of MRSA pneumonia by oral vancomycin decontamination: a randomised trial.** *Eur Resp J* 2004, **23**:921-926.
71. Stoutenbeek CP, van Saene HK, Miranda DR, Zandstra DF, Langrehr D: **The effect of oropharyngeal decontamination using topical nonabsorbable antibiotics on the incidence of nosocomial respiratory tract infections in multiple trauma patients.** *J Trauma* 1987, **27**:357-364.
72. Sydow M, Burchardi H, Crozier TA: **[The effect of selective decontamination on nosocomial infections, their causative agents and antibiotic resistance in long-term intubated intensive care patients].** *Anasth Intensivther Notfall Med* 1990, **25**:416-23.
73. van Patot HT, Leusink JA, Roodenburg J, De Jongh BM, Lau HS, de Boer S, De Boer A: **Selective decontamination of the digestive tract: effect of cessation of routine application at an ICU.** *Pharm World Sci* 1996, **18**:171-177.
74. Viviani M, Van Saene HK, Dezzoni R, Silvestri L, Di Lenarda R, Berlot G, Gullo A: **Control of imported and acquired methicillin-resistant *Staphylococcus aureus* (MRSA) in mechanically ventilated patients: a dose-response study of enteral vancomycin to reduce absolute carriage and infection.** *Anaesthesia and intensive care* 2005, **33**:361-372.
75. Barret JP, Jeschke MG, Herndon DN: **Selective decontamination of the digestive tract in severely burned pediatric patients.** *Burns* 2001, **27**:439-445.
76. Garbino J, Lew DP, Romand JA, Hugonnet S, Auckenthaler R, Pittet D: **Prevention of severe *Candida* infections in nonneutropenic, high-risk, critically ill patients: a randomized, double-blind, placebo-controlled trial in patients treated by selective digestive decontamination.** *Intensive Care Med* 2002, **28**:1708-1717.
77. Gaussorgues P, Salord M, Sirodot S, Tigaud S, Cagnin S, Gerard M, Robert D: **Efficiency of selective decontamination of the digestive tract on the occurrence of nosocomial bacteremia in patients on mechanical ventilation receiving betamimetic therapy.** *Réan Soins Intens Méd Urg* 1991, **7**:169-174.

78. Korinek AM, Laisne MJ, Nicolas MH, Raskine L, Deroin V, Sanson-Lepors MJ: **Selective decontamination of the digestive tract in neurosurgical intensive care unit patients: a double-blind, randomized, placebo-controlled study.** *Crit Care Med* 1993, **21**:1466-1473.
79. Langlois-Karaga A, Bues-Charbit M, Davignon A, Albanese J, Durbec O, Martin C, Balansard G: **Selective digestive decontamination in multiple trauma patients: cost and efficacy.** *Pharm World Sci* 1995, **17**:12-16.
80. Quinio B, Albanese J, Bues-Charbit M, Viviani X, Martin C: **Selective decontamination of the digestive tract in multiple trauma patients. A prospective double-blind, randomized, placebo-controlled study.** *Chest* 1996, **109**:765-772.
81. Rodriguez-Roldan JM, Altuna-Cuesta A, Lopez A, Carrillo A, Garcia J, Leon J, Martinez-Pellus AJ: **Prevention of nosocomial lung infection in ventilated patients: use of an antimicrobial pharyngeal nonabsorbable paste.** *Crit Care Med* 1990, **18**:1239-1242.
82. Ruza F, Alvarado F, Herruzo R, Delgado MA, Garcia S, Dorao P, Goded F: **Prevention of nosocomial infection in a pediatric intensive care unit (PICU) through the use of selective digestive decontamination.** *Eur J Epidemiol* 1998, **14**:719-27.
83. Wiener J, Itokazu G, Nathan C, Kabins SA, Weinstein RA: **A randomized, double-blind, placebo-controlled trial of selective digestive decontamination in a medical-surgical intensive care unit.** *Clin Infect Dis* 1995, **20**:861-867.
84. Aerdt SJ, van Dalen R, Clasener HA, Festen J, van Lier HJ, Vollaard EJ: **Antibiotic prophylaxis of respiratory tract infection in mechanically ventilated patients. A prospective, blinded, randomized trial of the effect of a novel regimen.** *Chest* 1991, **100**:783-791.
85. Blair P, Rowlands BJ, Lowry K, Webb H, Armstrong P, Smilie J: **Selective decontamination of the digestive tract: a stratified, randomized, prospective study in a mixed intensive care unit.** *Surgery* 1991, **110**:303-309.
86. Cerra FB, Maddaus MA, Dunn DL, Wells CL, Konstantinides NN, Lehmann SL, Mann HJ: **Selective gut decontamination reduces nosocomial infections and length of stay but not mortality or organ failure in surgical intensive care unit patients.** *Arch Surg* 1992, **127**:163-167.
87. Cockerill FR, 3rd, Muller SR, Anhalt JP, Marsh HM, Farnell MB, Mucha P, Gillespie DJ, Ilstrup DM, Larson-Keller JJ, Thompson RL: **Prevention of infection in critically ill patients by selective decontamination of the digestive tract.** *Ann Intern Med* 1992, **117**:545-553.
88. de La Cal MA, Cerda E, Garcia-Hierro P, Van Saene HK, Gómez-Santos D, Negro E, Lorente JA: **Survival benefit in critically ill burned patients receiving selective decontamination of the digestive tract: a randomized, placebo-controlled, double-blind trial.** *Ann Surg* 2005, **241**:424-430.
89. Finch RG, Tomlinson P, Holliday M, Sole K, Stack C, Rocker G: **Selective decontamination of the digestive tract (SDD) in the prevention of secondary sepsis in a medical/surgical intensive care unit [abstract].** Seventeenth international congress of chemotherapy, Berlin, 1991:No 0471.
90. Flaherty J, Nathan C, Kabins SA, Weinstein RA: **Pilot trial of selective decontamination for prevention of bacterial infection in an intensive care unit.** *J Infect Dis* 1990, **162**:1393-1397.
91. Jacobs S, Foweraker JE, Roberts SE: **Effectiveness of selective decontamination of the digestive tract (SDD) in an ICU with a policy encouraging a low gastric pH.** *Clin Intensive Med* 1992, **3**:52-58.

92. Kerver AJ, Rommes JH, Mevissen-Verhage EA, Hulstaert PF, Vos A, Verhoef J, Wittebol P: **Prevention of colonization and infection in critically ill patients: a prospective randomized study.** *Crit Care Med* 1988, **16**:1087-1093.
93. Krueger WA, Lenhart FP, Neeser G, Ruckdeschel G, Schreckhase H, Eissner HJ, Forst H, Eckart J, Peter K, Unertl KE: **Influence of combined intravenous and topical antibiotic prophylaxis on the incidence of infections, organ dysfunctions, and mortality in critically ill surgical patients: a prospective, stratified, randomized, double-blind, placebo-controlled clinical trial.** *Am J Respir Crit Care Med* 2002, **166**:1029-1037.
94. Palomar M, Alvarez-Lerma F, Jorda R, Bermejo B, for the Catalan Study Group of Nosocomial Pneumonia Prevention: **Prevention of nosocomial infection in mechanically ventilated patients: selective digestive decontamination versus sucralfate.** *Clin Intensive Care* 1997, **8**:228-235.
95. Rocha LA, Martin MJ, Pita S, Paz J, Seco C, Margusino L, Villanueva R, Duran MT: **Prevention of nosocomial infection in critically ill patients by selective decontamination of the digestive tract. A randomized, double blind, placebo-controlled study.** *Intensive Care Med* 1992, **18**:398-404.
96. Rolando N, Gimson A, Wade J, Philpott - Howard J, Casewell M, Williams R: **Prospective controlled trial of selective parenteral and enteral antimicrobial regimen in fulminant liver failure.** *Hepatology* 1993, **17**:196-201.
97. Sanchez Garcia M, Cambronero Galache JA, Lopez Diaz J, Cerda Cerda E, Rubio Blasco J, Gomez Aguinaga MA, Nunez Reiz A, Rogero Marin S, Onoro Canaveral JJ, Sacristan del Castillo JA: **Effectiveness and cost of selective decontamination of the digestive tract in critically ill intubated patients. A randomized, double-blind, placebo-controlled, multicenter trial.** *Am J Respir Crit Care Med* 1998, **158**:908-916.
98. Stoutenbeek CP, van Saene HKF, Little RA, Whitehead A: **The effect of selective decontamination of the digestive tract on mortality in multiple trauma patients: a multicenter randomized controlled trial.** *Intensive Care Med* 2007, **33**:261-70.
99. Ulrich C, Harinck-de Weerd JE, Bakker NC, Jacz K, Doornbos L, de Ridder VA: **Selective decontamination of the digestive tract with norfloxacin in the prevention of ICU-acquired infections: a prospective randomized study.** *Intensive Care Med* 1989, **15**:424-431.
100. Verwaest C, Verhaegen J, Ferdinande P, Schetz M, Van den Berghe G, Verbist L, Lauwers P: **Randomized, controlled trial of selective digestive decontamination in 600 mechanically ventilated patients in a multidisciplinary intensive care unit.** *Crit Care Med* 1997, **25**:63-71.
101. Zobel G, Kuttinig M, Grubbauer HM, Semmelrock HJ, Thiel W: **Reduction of colonization and infection rate during pediatric intensive care by selective decontamination of the digestive tract.** *Crit Care Med* 1991, **19**:1242-1246.
102. Arnow PM, Carandang GC, Zabner R, Irwin ME: **Randomized controlled trial of selective bowel decontamination for prevention of infections following liver transplantation.** *Clin Infect Dis* 1996, **22**:997-1003.
103. Bion JF, Badger I, Crosby HA, Hutchings P, Kong KL, Baker J, Hutton P, McMaster P, Buckels JA, Elliott TSJ: **Selective decontamination of the digestive tract reduces gram-negative pulmonary colonization but not systemic endotoxemia in patients undergoing elective liver transplantation.** *Crit Care Med* 1994, **22**:40-9.

104. Ferrer M, Torres A, Gonzalez J, Puig de la Bellacasa J, el-Ebiary M, Roca M, Gatell JM, Rodriguez-Roisin R: **Utility of selective digestive decontamination in mechanically ventilated patients.** *Ann Intern Med* 1994, **120**:389-395.
105. Georges B, Mazerolles M, Decun J-F, Rouge P, Pomies S, Cougot P: **Décontamination digestive sélective résultats d'une étude chez le polytraumatisé.** *Réanimation Soins Intensifs Médecin d'Urgence* 1994, **3**:621-627.
106. Hammond JM, Potgieter PD, Saunders GL, Forder AA: **Double-blind study of selective decontamination of the digestive tract in intensive care.** *Lancet* 1992, **340**:5-9.
107. Hartenauer U, Thulig B, Diemer W, Lawin P, Fegeler W, Kehrel R, Ritzerfeld W: **Effect of selective flora suppression on colonization, infection, and mortality in critically ill patients: a one-year, prospective consecutive study.** *Crit Care Med* 1991, **19**:463-73.
108. Hellinger WC, Yao JD, Alvarez S, Blair JE, Cawley JJ, Paya CV, O'Brien PC: **A randomized, prospective, double-blinded evaluation of selective bowel decontamination in liver transplantation.** *Transplantation* 2002, **73**:1904-9.
109. Laggner AN, Tryba M, Georgopoulos A, Lenz K, Grimm G, Graninger W, Schneeweiss B, Druml W: **Oropharyngeal decontamination with gentamicin for long-term ventilated patients on stress ulcer prophylaxis with sucralfate?** *Wien Klin Wochenschr* 1994, **106**:15-19.
110. Rolando N, Wade JJ, Stangou A, Gimson AE, Wendon J, Philpott - Howard J, Williams R: **Prospective study comparing the efficacy of prophylactic parenteral antimicrobials, with or without enteral decontamination, in patients with acute liver failure.** *Liver transpl Surg* 1996, **2**:8-13.
111. Stoutenbeek CP, van Saene HKF, Zandstra DF: **Prevention of multiple organ failure by selective decontamination of the digestive tract in multiple trauma patients.** In *The Immune Consequences of Shock, Trauma and Sepsis. Volume 2.* Edited by Faist E, Baue AE, Schildberg FW. Lengerich: Pabst Science; 1996:1055-66.
112. Tetteroo GWM, Castelein A, Tilanus HW, Ince C, Bruining HA, Wagenvoort JHT: **Selective decontamination to reduce gram-negative colonisation and infections after oesophageal resection.** *Lancet* 1990, **335**:704-7.
113. Verhaegen J. **Randomized study of selective digestive decontamination on colonization and prevention of infections in mechanically ventilated patients in the ICU.** Doctor of Medical Science thesis. University hospital, Leuven 1992.
