# Supplementary material for: Topical antibiotics as a major contextual hazard toward bacteremia within selective digestive decontamination studies: a meta-analysis
Source: Springer Nature journal article supplement (doi:10.1186/s12879-014-0714-x), 2014-12-01
Supplement: MOESM2 [file 9739434]

**Additional file 2:** Table of contents

|                                                                                                 |   |
|-------------------------------------------------------------------------------------------------|---|
| Figure S1: VAP-incidence proportion: observational studies (Benchmark groups)                   | 2 |
| Figure S2: VAP-incidence proportion: studies of VAP prevention using non-antibiotic methods     | 3 |
| Figure S3: VAP-incidence proportion: control groups of studies of VAP prevention using SDD      | 4 |
| Figure S4: VAP-incidence proportion: intervention groups of studies of VAP prevention using SDD | 5 |

## VAP incidence - Benchmark groups

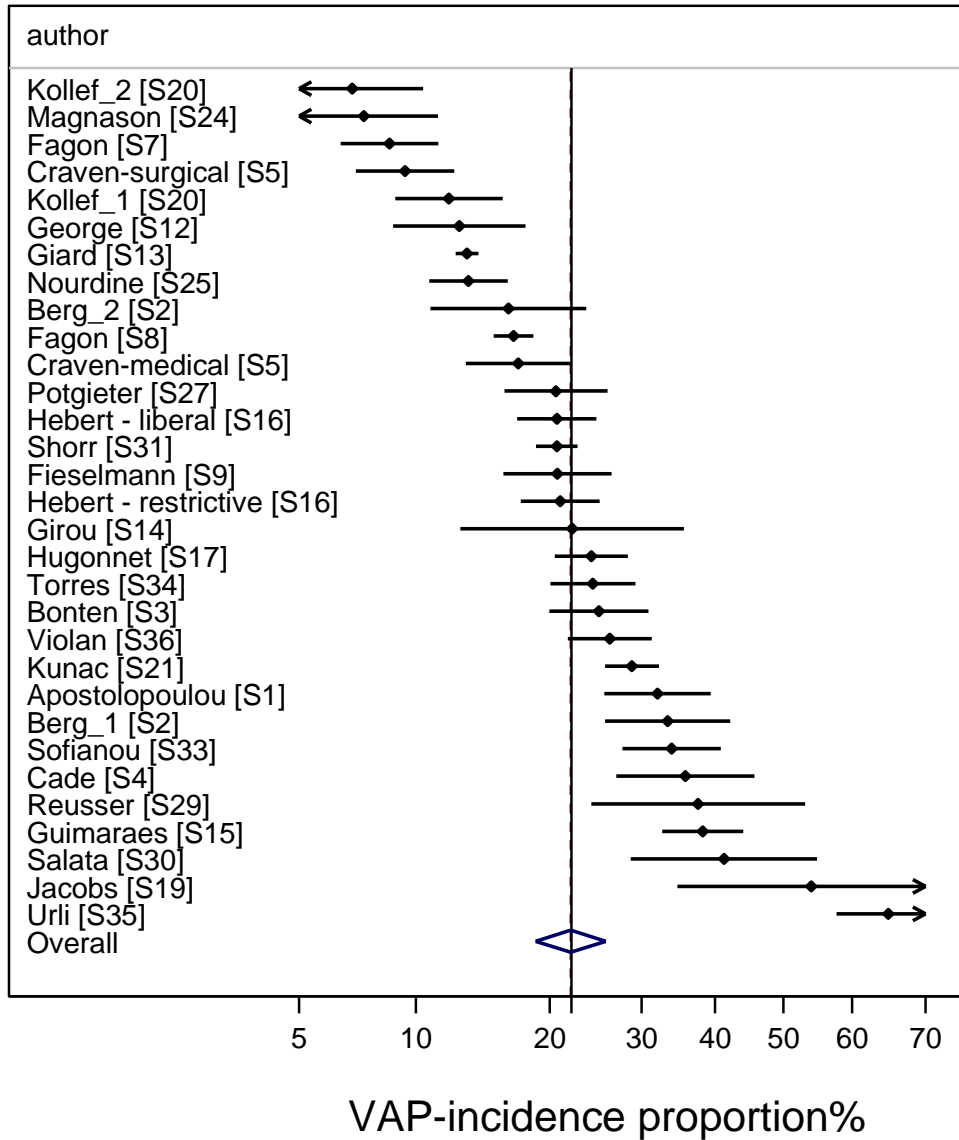

Figure S1. Caterpillar plots of the group specific (small diamonds) and summary (large open diamond, broken vertical line) VAP-incidence proportion and 95 % CI of observational studies (Benchmark groups). Studies are listed in Table S1. Note that the x axis is a logit scale.

# VAP incidence Non-antibiotic methods

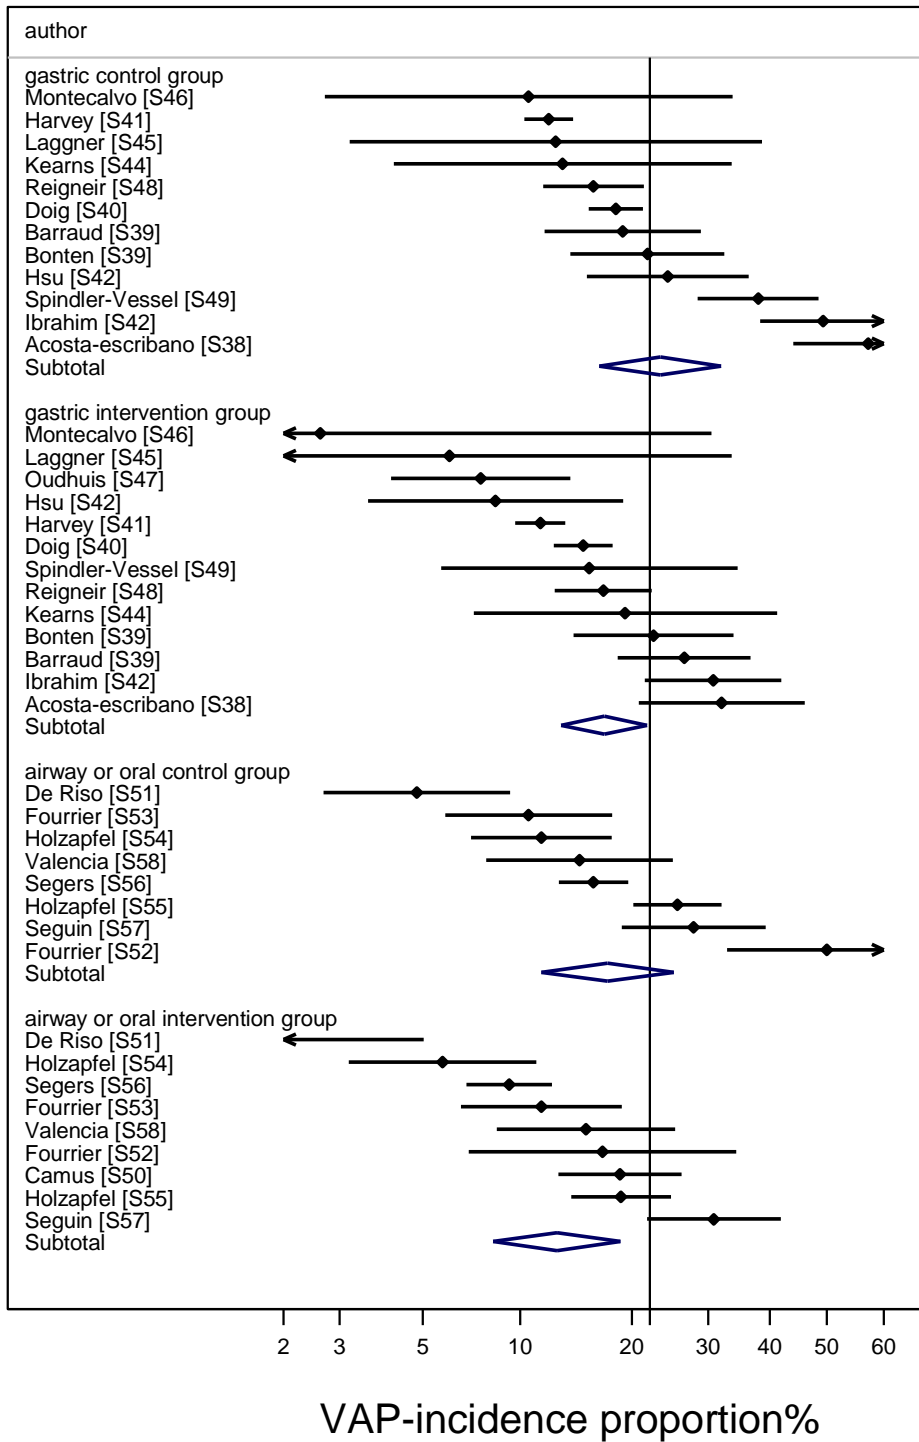

Figure S2. Caterpillar plots of the group specific (small diamonds) and summary (large open diamond, broken vertical line) VAP-incidence proportion and 95 % CI of control and intervention groups of studies of VAP prevention using non-antibiotic methods. For comparison, the summary VAP -IP (vertical line) derived from the benchmark groups from figure S1 is shown. Studies are listed in Table S2. Note that the x axis is a logit scale.

# VAP incidence Antibiotic methods - control groups

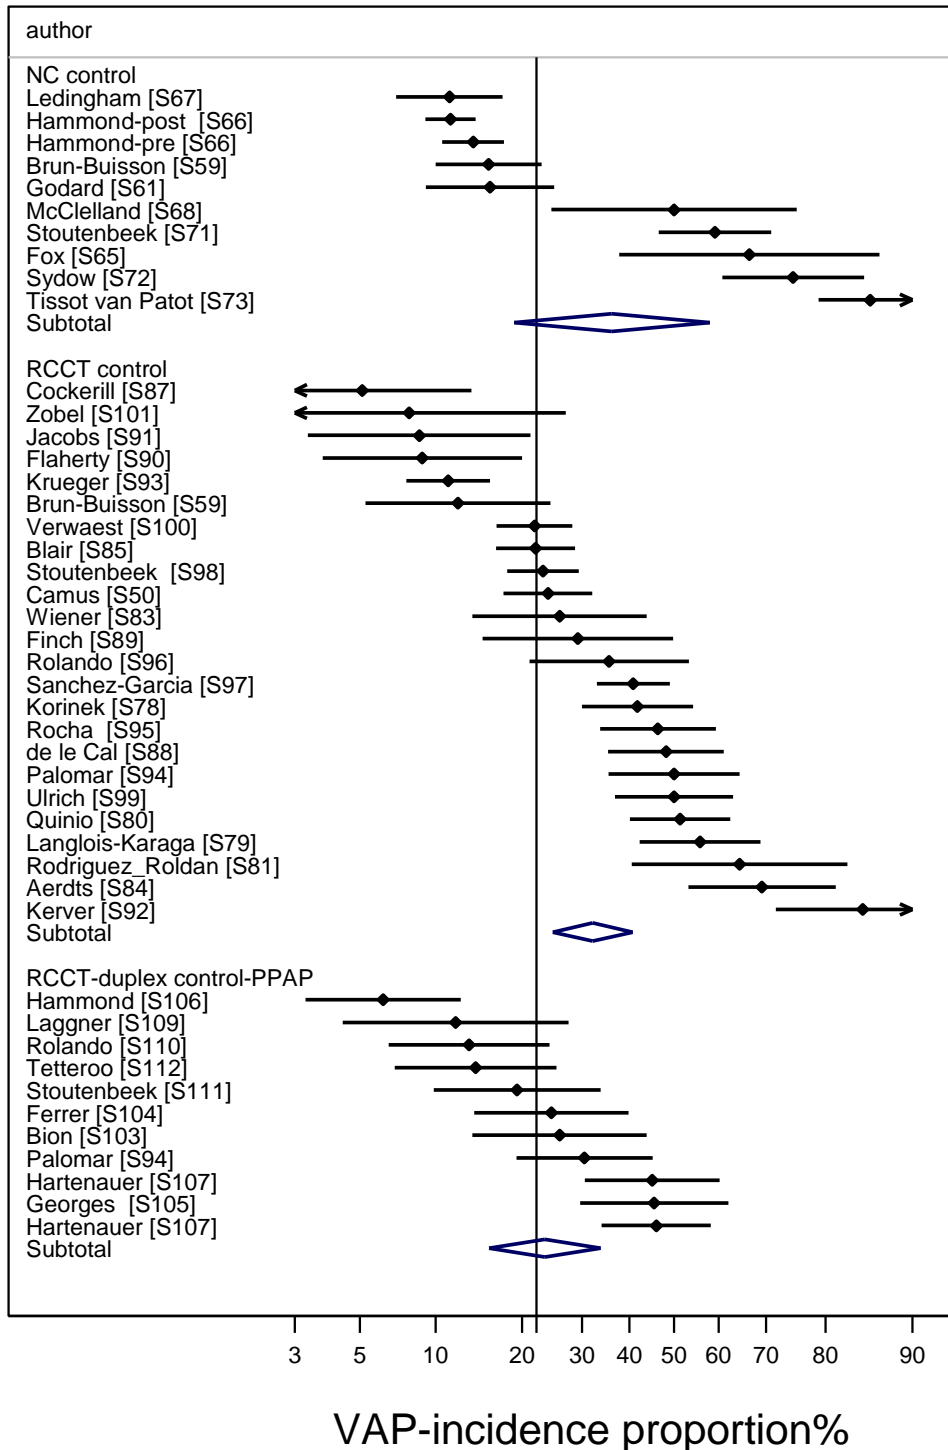

Figure S3. Caterpillar plots of the group specific (small diamonds) and summary (large open diamond) VAP-incidence proportion and 95 % CI of control groups of studies of VAP prevention using SDD for which the control groups did not or did receive topical placebo. For comparison, the summary VAP- IP (vertical line) derived from the benchmark groups from figure S1 are shown. Studies are listed in Tables S3, S4 & S5. Note that the x axis is a logit scale.

# VAP incidence

## Antibiotic methods - intervention groups

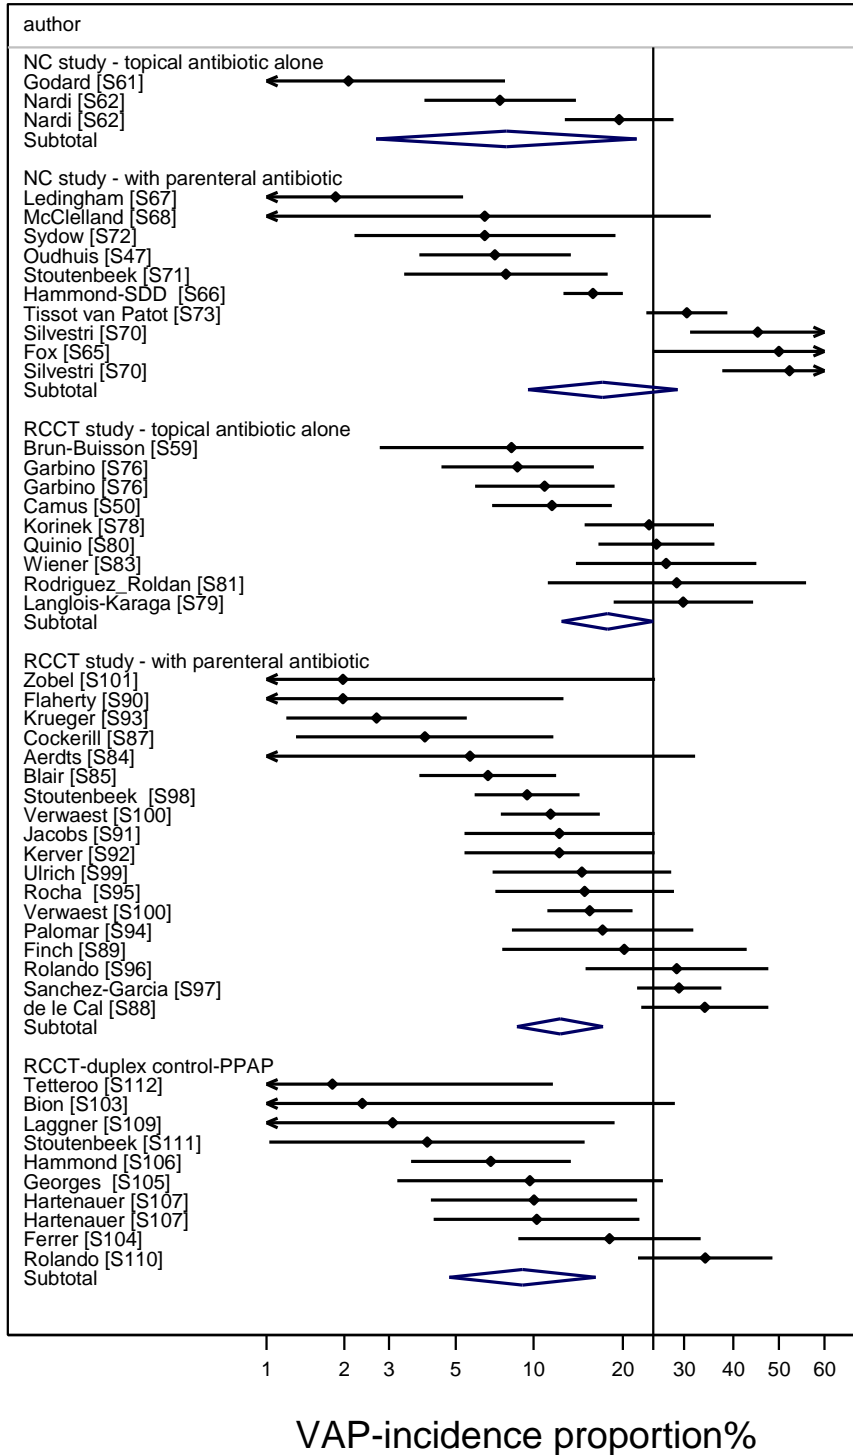

Figure S4. Caterpillar plots of the group specific (small diamonds) and summary (large open diamond) VAP-incidence proportion and 95 % CI of intervention groups of studies of VAP prevention using SDD for which the control groups did not or did receive topical placebo. For comparison, the summary VAP-IP (vertical line) derived from the benchmark groups from figure S1 are shown. Studies are listed in Tables S3, S4 and S5. Note that the x axis is a logit scale.
